# Supplementary material
Source: ML conference proceedings conference paper supplement (https://openreview.net/forum?id=bePaRx0otZ)
Supplement: supplementary_material [file attachment]

## APPENDIX

## A NOTATIONS

All notations in the main text and their descriptions are summarized in Table 5.

| Notation          | Description                                             |
|-------------------|---------------------------------------------------------|
| $x, \mathcal{X}$  | Query, Query set                                        |
| $y, \mathcal{Y}$  | Item, Item Set                                          |
| $\mathcal{X}_y^+$ | Queries related to item $y$                             |
| $\mathcal{Y}_x^+$ | Items related to query $x$                              |
| $\mathcal{D}$     | A Dataset consisting of $\mathcal{X}$ and $\mathcal{Y}$ |
| $\mathcal{Q}_x$   | The distribution of items related to $x$ in the index   |
| $p$               | Item-query relevance probability                        |
| $m$               | The number of queries                                   |
| $N$               | The number of items                                     |
| $\delta$          | A tolerance level                                       |
| $\Phi(\cdot)$     | The CDF of standard normal distribution                 |
| $P_Q^i$           | The distribution at the $i$ -th token of the query      |
| $P_I^i$           | The distribution at the $i$ -th token of the item       |
| $C^i$             | The token assigned to the item at the $i$ -th Layer     |
| $H(a, b)$         | Cross-entropy of $a$ and $b$                            |
| $H(b)$            | Entropy of $b$                                          |
| $U^k$             | A uniform distribution over $k$ classes                 |
| $k$               | The width of the index (The number of tokens)           |
| $L$               | The depth of the index (The number of Layers)           |

Table 5: Notations

## B DATASET STATISTICS

| Dataset        | #Query | #Item  | # Interaction |
|----------------|--------|--------|---------------|
| KuaiSAR        | 191330 | 112388 | 1093920       |
| Beauty         | 41895  | 15817  | 162713        |
| Toys and Games | 13271  | 25357  | 90557         |

Table 6: Dataset Statistics

We summarize the statistics of the three datasets in Table 6. Setting the tolerance level  $\delta$  to 0.95 and substituting the dataset density for  $p$ , all three datasets satisfy the conditions of Theorem 1. This indicates that our proposed greedy algorithm is applicable to most datasets and demonstrates the rationality of URI’s approach in simulating the greedy algorithm through machine learning.

## C PROOF OF THEOREM 1

Before deriving Theorem 1, we can transform the problem of recovering the allocation scheme into a matrix equation-solving problem. Let  $W$  be the interaction matrix between queries and items, with a size of  $m \times N$ . The value at a given position is 1 if the query is related to the item, and 0 otherwise. In a recommender system,  $W$  represents the user purchase matrix. Let  $H$  be the item allocation matrix, with a size of  $N \times k$ , where each row contains exactly one 1, and the sum of each

column is  $N/k$ . Define  $M = W \times H$ , where  $M$  has a size of  $m \times k$ , representing the frequency distribution of each query over the  $k$  buckets. Thus, the problem is transformed into solving for  $H$  given  $M$  and  $W$ . The conclusions of the theorem and the greedy algorithm are also correspondingly transformed, as described below.

### C.1 THEOREM

#### Theorem 2. (Correct Reconstruction Probability)

Given the following conditions:

- *Tolerance Level:* A tolerance level  $\delta \in (0, 1)$ .
- *Parameters:* Positive integers  $N$  and  $k$ , and a probability  $p \in (0, 1)$ .
- *Random Matrix  $W$ :* An  $m \times N$  binary matrix where each element  $W_{r,l}$  is independently and identically distributed (i.i.d.), satisfying:

$$P(W_{r,l} = 1) = p, \quad P(W_{r,l} = 0) = 1 - p$$

- *Structured Matrix  $H$ :* An  $N \times k$  binary matrix satisfying:
  - *Row Constraint:* Each row contains exactly one 1, and all other elements are 0.

$$\sum_{j=1}^k H_{i,j} = 1, \quad \forall i = 1, 2, \dots, N$$

- *Column Constraint:* Each column contains exactly  $N_j = \frac{N}{k}$  ones (assuming  $N$  is divisible by  $k$ ).

$$\sum_{i=1}^N H_{i,j} = N_j, \quad \forall j = 1, 2, \dots, k$$

- *Product Matrix  $M$ :* Defined as  $M = W \cdot H$ .

If the number of rows  $m$  in matrix  $W$  satisfies:

$$m \geq \frac{[\Phi^{-1}(1 - \delta)]^2 (1 + \frac{2N}{k} p(1 + p))}{p(1 - p)}$$

Then, using the following greedy algorithm, the probability that each row of matrix  $H$  is correctly reconstructed is:

$$P_{correct} \geq 1 - \delta$$

### C.2 GREEDY ALGORITHM DESCRIPTION

For each row index  $i = 1, 2, \dots, N$ :

1. Identify Set  $S_i$ : Find all rows in matrix  $W$  where the  $i$ -th column is 1.

$$S_i = \{r \mid W_{r,i} = 1\}$$

2. Compute Vector  $s_i$ : For each column  $j = 1, 2, \dots, k$ , calculate the sum of corresponding entries in matrix  $M$ :

$$s_i^{(j)} = \sum_{r \in S_i} M_{r,j}$$

3. Select Maximum: Determine the column  $j^*$  with the highest sum:

$$j^* = \arg \max_j s_i^{(j)}$$

4. Update Matrix  $H$ : Assign the 1 in the  $i$ -th row of  $H$  to column  $j^*$ :

$$H_{i,j^*} = 1$$

756 C.3 PROOF

757 **Step 1: Definition of Difference Variable  $\Delta s_i^{(j)}$**

758 For a given row index  $i$  and any incorrect column  $j \neq j^*$  (where  $j^*$  is the correct column), define  
759 the difference:  
760

$$761 \Delta s_i^{(j)} = s_i^{(j^*)} - s_i^{(j)}$$

762 Using the structure of the problem:  
763

$$764 \Delta s_i^{(j)} = c_{i,i} + \sum_{l \neq i} (H_{l,j^*} - H_{l,j}) c_{i,l}$$

765 where:  $c_{i,i}$  is the number of rows in matrix  $W$  where column  $i$  has a value of 1.  $c_{i,l}$  is the number  
766 of rows in matrix  $W$  where both columns  $i$  and  $l$  have a value of 1.  
767

768 **Step 2: Calculate Expectation and Variance of  $c_{i,i}$  and  $c_{i,l}$**

769 (a) For  $c_{i,i}$ :

770 Since  $c_{i,i}$  counts the number of times the  $i$ -th column in  $W$  contains a 1, it can be written as:  
771

$$772 c_{i,i} = \sum_{r=1}^m W_{r,i}$$

773 where  $W_{r,i}$  is an independent Bernoulli random variable with probability  $p$ . Therefore:  
774

775 - Expectation:

$$776 E[c_{i,i}] = m \cdot p$$

777 - Variance:

$$778 \text{Var}[c_{i,i}] = m \cdot p(1 - p)$$

779 (b) For  $c_{i,l}$  (when  $l \neq i$ ):

780 Similarly,  $c_{i,l}$  counts the number of times both columns  $i$  and  $l$  in matrix  $W$  contain a 1. Since  $W_{r,i}$   
781 and  $W_{r,l}$  are independent Bernoulli variables:  
782

783 - Expectation:

$$784 E[c_{i,l}] = m \cdot p^2$$

785 - Variance:

$$786 \text{Var}[c_{i,l}] = m \cdot p^2(1 - p^2)$$

787 **Step 3: Expectation and Variance of  $\Delta s_i^{(j)}$**

788 We now calculate the expectation and variance of  $\Delta s_i^{(j)}$ .  
789

790 (a) Expectation of  $\Delta s_i^{(j)}$ :

791 Using the linearity of expectation and the fact that the expectation of  $H_{l,j^*} - H_{l,j}$  is zero (as both  
792 are binary variables):  
793

$$794 E[\Delta s_i^{(j)}] = E[c_{i,i}] = m \cdot p(1 - p)$$

795 (b) Variance of  $\Delta s_i^{(j)}$ :

796 Since  $c_{i,i}$  and  $c_{i,l}$  are independent, the variance of  $\Delta s_i^{(j)}$  is the sum of the variances of the terms:  
797

$$798 \text{Var}[\Delta s_i^{(j)}] = \text{Var}[c_{i,i}] + \sum_{l \neq i} (H_{l,j^*} - H_{l,j})^2 \cdot \text{Var}[c_{i,l}]$$

799 Since  $(H_{l,j^*} - H_{l,j})^2$  takes values of 0 or 1 (with 1 occurring when one column contains a 1 and  
800 the other does not), let  $n$  be the number of times  $(H_{l,j^*} - H_{l,j})^2 = 1$ . We have:  
801

$$802 n \leq \left( \frac{N}{k} - 1 \right) + \frac{N}{k} \leq \frac{2N}{k}$$

810 Thus, the variance becomes:

$$811 \text{Var}[\Delta s_i^{(j)}] = \text{Var}[c_{i,i}] + n \cdot \text{Var}[c_{i,l}]$$

812 Substitute the values of  $\text{Var}[c_{i,i}]$  and  $\text{Var}[c_{i,l}]$ :

$$813 \text{Var}[\Delta s_i^{(j)}] = m \cdot p(1-p) + n \cdot m \cdot p^2(1-p^2)$$

#### 814 **Step 4: Apply the Central Limit Theorem**

815 By the Central Limit Theorem, since  $m$  is a fairly large number, we approximate  $\Delta s_i^{(j)}$  as a normally distributed variable:

$$816 \Delta s_i^{(j)} \sim \mathcal{N}\left(E[\Delta s_i^{(j)}], \text{Var}[\Delta s_i^{(j)}]\right)$$

817 Thus, the probability of correct assignment is:

$$818 P\left(\Delta s_i^{(j)} > 0\right) = \Phi\left(\frac{E[\Delta s_i^{(j)}]}{\sqrt{\text{Var}[\Delta s_i^{(j)}]}}\right)$$

819 where  $\Phi$  is the CDF of the standard normal distribution.

#### 820 **Step 5: Substitute the Expectation and Variance**

821 Substitute the expressions for  $E[\Delta s_i^{(j)}]$  and  $\text{Var}[\Delta s_i^{(j)}]$  into the probability formula:

$$822 P\left(\Delta s_i^{(j)} > 0\right) = \Phi\left(\frac{mp(1-p)}{\sqrt{mp(1-p) + nmp^2(1-p^2)}}\right)$$

#### 823 **Step 6: Substitute $m$ and $n$**

824 Simplify the Expression:

$$825 P\left(\Delta s_i^{(j)} > 0\right) = \Phi\left(\frac{\sqrt{mp(1-p)}}{\sqrt{1 + np(1+p)}}\right)$$

826 Substitute  $n \leq \frac{2N}{k}$ ,  $m \geq \frac{[\Phi^{-1}(1-\delta)]^2(1 + \frac{2N}{k}p(1+p))}{p(1-p)}$ :

$$827 P\left(\Delta s_i^{(j)} > 0\right) = \Phi\left(\frac{\sqrt{mp(1-p)}}{\sqrt{1 + np(1+p)}}\right) \geq 1 - \delta$$

828  
829  
830  
831  
832  
833  
834  
835  
836  
837  
838  
839  
840  
841  
842  
843  
844  
845  
846  
847  
848  
849  
850  
851  
852  
853  
854  
855  
856  
857  
858  
859  
860  
861  
862  
863
